# Supplementary material for: Salt Tolerant Bacillus Strains Improve Plant Growth Traits and Regulation of Phytohormones in Wheat under Salinity Stress
Source: MDPI journal article supplement (doi:10.3390/plants11202769), 2022-10-19
Supplement: s1 [file s1]

## Supplementary File

# Salt Tolerant Promoting *Bacillus* Strains Improves Plant Growth Traits and Regulation of Phytohormones in Wheat under Salinity Stress

Muhammad Ayaz<sup>1, †</sup>, Qurban Ali<sup>1, †</sup>, Qifan Jiang<sup>1</sup>, Ruoyi Wang<sup>1</sup>, Zhengqi Wang<sup>1</sup>, Guangyuan Mu<sup>2</sup>, Sabaz Ali Khan<sup>3</sup>, Abdur Rashid Khan<sup>1</sup>, Huijun Wu<sup>1</sup>, Xuwen Gao<sup>1</sup>, and Qin Gu<sup>1\*</sup>

<sup>1</sup>Department of Plant Pathology, College of Plant Protection, Nanjing Agricultural University, Key Laboratory of Integrated Management of Crop Diseases and Pests, Ministry of Education, Nanjing 210095, China.

<sup>2</sup>Shenzhen Batian Ecological Engineering Co., Ltd, Shenzhen 518057, China.

<sup>3</sup>College of Environmental sciences, Biotechnology department, COMSATS, Abbottabad (22060), Pakistan.

\*Correspondence: guqin@njau.edu.cn (Q.G.); Tel: +86-025-8439-5268.

† These authors contributed equally to this study.

**Table S1.** Primers used in this study.

| Gene Name                                   | Primers    | Sequences              |
|---------------------------------------------|------------|------------------------|
| <b>Growth promoting genes for qPCR</b>      |            |                        |
| CKX2                                        | CKX2 (F):  | CGGGATAGGGTACAAGGAGTA  |
|                                             | CKX2 (R):  | GTACTTGTCCTTCATCTCCACG |
| ERF                                         | ERF (F):   | TGCCCTTCGATCTGAACATG   |
|                                             | ERF (R):   | TCCCACGAATCCTTGCTATTC  |
| ARF                                         | ARF (F):   | AGATGTTTCAGCACCTTCACC  |
|                                             | ARF (R):   | CAGTCTCCATCCTTGCTTCG   |
| ExpA1                                       | ExpA1(F):  | CACCAACAAGCAGTTCTCTTA  |
|                                             | ExpA1 (R): | CATGGATGGACACAATACCTC  |
| P5CS                                        | P5CS (F)   | GATTCTCCGATGGTGCTCGT   |
|                                             | P5CS (R):  | TTCAACACCCACAGGTCCAC   |
| 4-HNE                                       | 4-HNE (F): | CAAGTACCACTTCGACCTGAG  |
|                                             | 4-HNE (R): | CCTCTTGAAGTGGATGTCGATG |
| ABARE                                       | ABARE (F): | TTACACCGTGGAGCTTGAAG   |
|                                             | ABARE (R): | TTCACGTTCTCCTTGGACTG   |
| <b>Wheat salt resistance genes for qPCR</b> |            |                        |
| DREB2                                       | DREB1 F:   | AGCAGTAATCTTCCCTGTAATG |
|                                             | DREB1 R:   | CAGTTGTTGGTTCACTTCTTTC |

|                                                                                  |          |                        |
|----------------------------------------------------------------------------------|----------|------------------------|
| MYB                                                                              | MYB F:   | CAGATTGACGACAGCTTCTG   |
|                                                                                  | MYB R:   | TCTGTGACAACTCTGCATATC  |
| HTK1                                                                             | HTK1 F:  | GGAGGATCACAAAGGTGAAG   |
|                                                                                  | HTK1 R:  | GCCCATCAAAGACTGAAGAA   |
| ACTIN                                                                            | ACTIN F: | GCCACACTGTTCCAATCTAT   |
|                                                                                  | ACTIN R: | GAGCTTCTCCTTTATGTCTCTG |
| WRKY17                                                                           | WRKY F:  | CCTCTTTGGCTTCTCCTTTC   |
|                                                                                  | WRKY R:  | CAGTTGTATCCGTCTCTCAAC  |
| <b>Bacillus salt-related genes for qPCR</b>                                      |          |                        |
| DegU                                                                             | DegU F:  | TCTATCTATTCATGACGATG   |
|                                                                                  | DegU R:  | GTCGGAATTCATTTACTAAG   |
| OstB                                                                             | OstB F:  | GAAGCAACAGGAGAGTATTA   |
|                                                                                  | OstB R:  | GCGTTGATCCTTCGAGATATT  |
| OhrR                                                                             | OhrR F:  | GGTACGAATCCAGAGCAATTAT |
|                                                                                  | OhrR R:  | AGCTTGACACCAAGCTTAAA   |
| ComA                                                                             | ComA F:  | GAGTTGAAGGACAAGTAGCC   |
|                                                                                  | ComA R:  | GAATCGCAGAGGTCATCATC   |
| SodA                                                                             | SodA F:  | GGTCAAATGCTTCGTCTTATTG |
|                                                                                  | SodA R:  | AGAGCTAGAAGAGGGATGAC   |
| OpuAC                                                                            | OpuAC F: | ATACATATACAGGCATTACAG  |
|                                                                                  | OpuAC R: | CAGAATCAGACTTCCTAATC   |
| <b>Primers used for salt stress-related genes detections in Bacillus strains</b> |          |                        |
| OpuAC                                                                            | OpuAC F: | GACCGCCCTGCTTGTCTTTT   |
|                                                                                  | OpuAC R: | CTAGACCCATGCGAAGACCT   |
| OstB                                                                             | OstB F:  | CTGTCTGAATGGCAGACGAA   |
|                                                                                  | OstB R:  | CGCAACGTAAATCCCTTCAT   |
| DegU                                                                             | DegU F:  | TCACCAATTATTCGGTGAAGG  |
|                                                                                  | DegU R:  | TCATTTCTACCCAGCCGTTT   |
| ComA                                                                             | ComA F:  | GCTTGATCCGATGATTCTCC   |
|                                                                                  | ComA R:  | CGACACCGCCTACTTCACTT   |
| OhrR                                                                             | OhrR F:  | ATGGCAGAGCGTTTTGTAGG   |
|                                                                                  | OhrR R:  | GGCAAAGTCCACCAGTTTGT   |
| SODA                                                                             | SODA F:  | AAATTACCTCCGCTCCCTTAC  |
|                                                                                  | SODA R:  | AAGTAGAAGGTGTTGGCTGG   |
